# Supplementary material for: Molecular Characterization of Enterococcus Isolates From Different Sources in Estonia Reveals Potential Transmission of Resistance Genes Among Different Reservoirs
Source: Front Microbiol. 2021 Mar 26;12:601490. doi: 10.3389/fmicb.2021.601490 (PMC8032980; doi:10.3389/fmicb.2021.601490)
Supplement: Supplementary file 1 [file Table_1.XLSX]

## Sheet: Metadata_Enterococci
Type	Organism	Isolate name	Host species	Isolation source	Infection/colonization	Hospitalisation	Diagnosis	Counrtry	Collection date	Van MIC mg/l	Bioproject accession	Biosample accesssion	Assembly accession	GenBank accession
wild bird	Enterococcus faecium	BIRD-185	Columba livia	faeces	colonization	–	–	Estonia	2014-05-15	0.38	PRJNA630475	SAMN15957533	GCA_014854265.1	JACZCA000000000
environment	Enterococcus faecium	ENV-120	–	river	–	–	–	Estonia	2013-08-08	1.5	PRJNA630475	SAMN15957545	GCA_014855125.1	JACZBO000000000
environment	Enterococcus faecium	ENV-269	–	river	–	–	–	Estonia	2014-06-09	0.38	PRJNA630475	SAMN15957549	GCA_014854075.1	JACZBK000000000
environment	Enterococcus faecium	ENV-283	–	manure	–	–	–	Estonia	2014-06-09	0.38	PRJNA630475	SAMN15957550	GCA_014855085.1	JACZBJ000000000
environment	Enterococcus faecium	ENV-324	–	river	–	–	–	Estonia	2014-08-23	0.75	PRJNA630475	SAMN15957551	GCA_014855055.1	JACZBI000000000
human	Enterococcus faecium	HUM-568	Homo sapiens	faeces	colonization	No	NA	Estonia	2012-09-25	1.5	PRJNA630475	SAMN15957561	GCA_014853835.1	JACZAY000000000
human	Enterococcus faecium	HUM-574	Homo sapiens	NA	NA	yes	NA	Estonia	2013	1	PRJNA630475	SAMN15957567	GCA_014854975.1	JACZAS000000000
human	Enterococcus faecium	HUM-575	Homo sapiens	NA	NA	yes	NA	Estonia	2013	1.5	PRJNA630475	SAMN15957568	GCA_014854915.1	JACZAR000000000
veterinary	Enterococcus faecium	VET-206	Bos taurus	faeces	colonization	–	–	Estonia	2014	1	PRJNA630475	SAMN15957575	GCA_014853675.1	JACZAK000000000
veterinary	Enterococcus faecium	VET-208	Sus scrofa	faeces	colonization	–	–	Estonia	2014	1	PRJNA630475	SAMN15957576	GCA_014853505.1	JACZAJ000000000
veterinary	Enterococcus faecium	VET-209	Sus scrofa	faeces	colonization	–	–	Estonia	2014	0.75	PRJNA630475	SAMN15957577	GCA_014853485.1	JACZAI000000000
veterinary	Enterococcus faecium	VET-233	Gallus gallus	caecal content	colonization	–	–	Estonia	2014	2	PRJNA630475	SAMN15957580	GCA_014854925.1	JACZAF000000000
veterinary	Enterococcus faecium	VET-234	Gallus gallus	caecal content	colonization	–	–	Estonia	2014	2	PRJNA630475	SAMN15957581	GCA_014853415.1	JACZAE000000000
veterinary	Enterococcus faecium	VET-241	Gallus gallus	caecal content	colonization	–	–	Estonia	2014	0.5	PRJNA630475	SAMN15957586	GCA_014853295.1	JACYZZ000000000
veterinary	Enterococcus faecium	VET-244	Gallus gallus	caecal content	colonization	–	–	Estonia	2014	0.5	PRJNA630475	SAMN15957588	GCA_014853305.1	JACYZX000000000
veterinary	Enterococcus faecium	VET-261	Gallus gallus	caecal content	colonization	–	–	Estonia	2014	0.75	PRJNA630475	SAMN15957599	GCA_014853085.1	JACYZM000000000
veterinary	Enterococcus faecium	VET-262	Gallus gallus	caecal content	colonization	–	–	Estonia	2014	1.5	PRJNA630475	SAMN15957600	GCA_014853065.1	JACYZL000000000
veterinary	Enterococcus faecium	VET-263	Gallus gallus	caecal content	colonization	–	–	Estonia	2014	0.38	PRJNA630475	SAMN15957601	GCA_014853025.1	JACYZK000000000
veterinary	Enterococcus faecium	VET-264	Gallus gallus	caecal content	colonization	–	–	Estonia	2014	0.75	PRJNA630475	SAMN15957602	GCA_014852975.1	JACYZJ000000000
veterinary	Enterococcus faecium	VET-265	Gallus gallus	caecal content	colonization	–	–	Estonia	2014	0.5	PRJNA630475	SAMN15957603	GCA_014852995.1	JACYZI000000000
veterinary	Enterococcus faecium	VET-266	Gallus gallus	caecal content	colonization	–	–	Estonia	2014	0.5	PRJNA630475	SAMN15957604	GCA_014853005.1	JACYZH000000000
veterinary	Enterococcus faecium	VET-267	Gallus gallus	caecal content	colonization	–	–	Estonia	2014	0.38	PRJNA630475	SAMN15957605	GCA_014852955.1	JACYZG000000000
veterinary	Enterococcus faecium	VET-268	Gallus gallus	caecal content	colonization	–	–	Estonia	2014	0.75	PRJNA630475	SAMN15957606	GCA_014852945.1	JACYZF000000000
veterinary	Enterococcus faecium	VET-269	Gallus gallus	caecal content	colonization	–	–	Estonia	2014	0.75	PRJNA630475	SAMN15957607	GCA_014852875.1	JACYZE000000000
veterinary	Enterococcus faecium	VET-271	Gallus gallus	caecal content	colonization	–	–	Estonia	2014	1.0	PRJNA630475	SAMN15957608	GCA_014852885.1	JACYZD000000000
veterinary	Enterococcus faecium	VET-272	Gallus gallus	caecal content	colonization	–	–	Estonia	2014	1.5	PRJNA630475	SAMN15957609	GCA_014852865.1	JACYZC000000000
veterinary	Enterococcus faecium	VET-275	Gallus gallus	caecal content	colonization	–	–	Estonia	2014	0.38	PRJNA630475	SAMN15957610	GCA_014852855.1	JACYZB000000000
veterinary	Enterococcus faecium	VET-276	Gallus gallus	caecal content	colonization	–	–	Estonia	2014	0.75	PRJNA630475	SAMN15957611	GCA_014852845.1	JACYZA000000000
veterinary	Enterococcus faecium	VET-277	Gallus gallus	caecal content	colonization	–	–	Estonia	2014	0.38	PRJNA630475	SAMN15957612	GCA_014852805.1	JACYYZ000000000
veterinary	Enterococcus faecium	VET-279	Gallus gallus	caecal content	colonization	–	–	Estonia	2014	0.5	PRJNA630475	SAMN15957613	GCA_014852815.1	JACYYY000000000
veterinary	Enterococcus faecium	VET-281	Gallus gallus	caecal content	colonization	–	–	Estonia	2014	0.25	PRJNA630475	SAMN15957614	GCA_014852755.1	JACYYX000000000
veterinary	Enterococcus faecium	VET-283	Gallus gallus	caecal content	colonization	–	–	Estonia	2014	0.38	PRJNA630475	SAMN15957615	GCA_014852745.1	JACYYW000000000
veterinary	Enterococcus faecium	VET-285	Gallus gallus	caecal content	colonization	–	–	Estonia	2014	0.5	PRJNA630475	SAMN15957616	GCA_014852765.1	JACYYV000000000
veterinary	Enterococcus faecium	VET-287	Gallus gallus	caecal content	colonization	–	–	Estonia	2014	0.5	PRJNA630475	SAMN15957617	GCA_014852665.1	JACYYU000000000
wild bird	Enterococcus faecalis	BIRD-101	Clanga pomarina	faeces	colonization	–	–	Estonia	2013-07-08	3	PRJNA630476	SAMN15957523	GCA_014854385.1	JACZCK000000000
wild bird	Enterococcus faecalis	BIRD-102	Clanga pomarina	faeces	colonization	–	–	Estonia	2013-07-03	1	PRJNA630477	SAMN15957524	GCA_014855435.1	JACZCJ000000000
wild bird	Enterococcus faecalis	BIRD-126	Clanga pomarina	faeces	colonization	–	–	Estonia	2013-07-08	3	PRJNA630478	SAMN15957525	GCA_014855445.1	JACZCI000000000
wild bird	Enterococcus faecalis	BIRD-127	Buteo buteo	faeces	colonization	–	–	Estonia	2013-07-03	1.5	PRJNA630479	SAMN15957526	GCA_014855415.1	JACZCH000000000
wild bird	Enterococcus faecalis	BIRD-170	Accipiter gentilis	faeces	colonization	–	–	Estonia	2014-05-30	0.75	PRJNA630480	SAMN15957527	GCA_014855345.1	JACZCG000000000
wild bird	Enterococcus faecalis	BIRD-173	Accipiter gentilis	faeces	colonization	–	–	Estonia	2014-05-30	0.5	PRJNA630481	SAMN15957528	GCA_014854325.1	JACZCF000000000
wild bird	Enterococcus faecalis	BIRD-174	Accipiter gentilis	faeces	colonization	–	–	Estonia	2014-05-30	0.75	PRJNA630482	SAMN15957529	GCA_014855375.1	JACZCE000000000
wild bird	Enterococcus faecalis	BIRD-175	Accipiter gentilis	faeces	colonization	–	–	Estonia	2014-05-30	1.0	PRJNA630483	SAMN15957530	GCA_014855355.1	JACZCD000000000
wild bird	Enterococcus faecalis	BIRD-176	Accipiter gentilis	faeces	colonization	–	–	Estonia	2014-05-30	0.75	PRJNA630484	SAMN15957531	GCA_014855335.1	JACZCC000000000
wild bird	Enterococcus faecalis	BIRD-178	Accipiter gentilis	faeces	colonization	–	–	Estonia	2014-05-30	1	PRJNA630485	SAMN15957532	GCA_014855315.1	JACZCB000000000
wild bird	Enterococcus faecalis	BIRD-238	Accipiter gentilis	faeces	colonization	–	–	Estonia	2014-06-13	2	PRJNA630486	SAMN15957534	GCA_014855285.1	JACZBZ000000000
wild bird	Enterococcus faecalis	BIRD-62	Buteo buteo	faeces	colonization	–	–	Estonia	2013-07-03	3	PRJNA630487	SAMN15957535	GCA_014855245.1	JACZBY000000000
wild bird	Enterococcus faecalis	BIRD-63	Clanga pomarina	faeces	colonization	–	–	Estonia	2013-07-03	1.5	PRJNA630488	SAMN15957536	GCA_014855265.1	JACZBX000000000
wild bird	Enterococcus faecalis	BIRD-64	Clanga pomarina	faeces	colonization	–	–	Estonia	2013-07-09	1.5	PRJNA630489	SAMN15957537	GCA_014855235.1	JACZBW000000000
wild bird	Enterococcus faecalis	BIRD-65	Clanga pomarina	faeces	colonization	–	–	Estonia	2013-07-15	1	PRJNA630490	SAMN15957538	GCA_014855215.1	JACZBV000000000
wild bird	Enterococcus faecalis	BIRD-73	Clanga pomarina	faeces	colonization	–	–	Estonia	2013-07-12	1	PRJNA630491	SAMN15957539	GCA_014855175.1	JACZBU000000000
wild bird	Enterococcus faecalis	BIRD-74	Buteo buteo	faeces	colonization	–	–	Estonia	2013-07-03	1.5	PRJNA630492	SAMN15957540	GCA_014855165.1	JACZBT000000000
wild bird	Enterococcus faecalis	BIRD-78	Buteo buteo	faeces	colonization	–	–	Estonia	2013-07-03	3	PRJNA630493	SAMN15957541	GCA_014854205.1	JACZBS000000000
wild bird	Enterococcus faecalis	BIRD-91	Clanga pomarina	faeces	colonization	–	–	Estonia	2013-07-15	1.5	PRJNA630494	SAMN15957542	GCA_014855155.1	JACZBR000000000
wild bird	Enterococcus faecalis	BIRD-94	Buteo buteo	faeces	colonization	–	–	Estonia	2013-07-03	1.5	PRJNA630495	SAMN15957543	GCA_014854175.1	JACZBQ000000000
wild bird	Enterococcus faecalis	BIRD-97	Clanga pomarina	faeces	colonization	–	–	Estonia	2013-07-09	2	PRJNA630496	SAMN15957544	GCA_014854165.1	JACZBP000000000
environment	Enterococcus faecalis	ENV-128	–	river	–	–	–	Estonia	2013-08-08	6	PRJNA630497	SAMN15957546	GCA_014854055.1	JACZBN000000000
environment	Enterococcus faecalis	ENV-131	–	river	–	–	–	Estonia	2013-07-08	0.75	PRJNA630498	SAMN15957547	GCA_014854065.1	JACZBM000000000
environment	Enterococcus faecalis	ENV-155	–	manure	–	–	–	Estonia	2014-06-06	3	PRJNA630499	SAMN15957548	GCA_014855115.1	JACZBL000000000
environment	Enterococcus faecalis	ENV-505	–	manure	–	–	–	Estonia	2014-08-26	1.5	PRJNA630500	SAMN15957552	GCA_014855045.1	JACZBH000000000
environment	Enterococcus faecalis	ENV-506	–	manure	–	–	–	Estonia	2014-08-26	1.5	PRJNA630501	SAMN15957553	GCA_014855015.1	JACZBG000000000
environment	Enterococcus faecalis	ENV-507	–	manure	–	–	–	Estonia	2014-08-26	3	PRJNA630502	SAMN15957554	GCA_014854015.1	JACZBF000000000
environment	Enterococcus faecalis	ENV-79	–	manure	–	–	–	Estonia	2014-05-13	3	PRJNA630503	SAMN15957555	GCA_014853935.1	JACZBE000000000
environment	Enterococcus faecalis	ENV-93	–	river	–	–	–	Estonia	2013-06-27	2	PRJNA630504	SAMN15957556	GCA_014853915.1	JACZBD000000000
human	Enterococcus faecalis	HUM-320-D2	Homo sapiens	tracheal aspirate	NA	yes	penumonia	Estonia	2013	NA	PRJNA630505	SAMN15957557	GCA_014853945.1	JACZBC000000000
human	Enterococcus faecalis	HUM-326	Homo sapiens	missing	colonization	yes	NA	Estonia	2013	NA	PRJNA630506	SAMN15957558	GCA_014855035.1	JACZBB000000000
human	Enterococcus faecalis	HUM-328	Homo sapiens	missing	colonization	yes	NA	Estonia	2013	NA	PRJNA630507	SAMN15957559	GCA_014853795.1	JACZBA000000000
human	Enterococcus faecalis	HUM-409	Homo sapiens	wound discharge	infection	yes	Skin and soft tissue infection	Estonia	2013-02-19	32	PRJNA630508	SAMN15957560	GCA_014853825.1	JACZAZ000000000
human	Enterococcus faecalis	HUM-409	Homo sapiens	wound discharge	infection	yes	Skin and soft tissue infection	Estonia	2013-02-19	32	PRJNA630509	SAMN15957560	GCA_014853825.1	JACZAZ000000000
human	Enterococcus faecalis	HUM-569	Homo sapiens	faeces	colonization	no	–	Estonia	2012-09-26	1.5	PRJNA630510	SAMN15957562	GCA_014853845.1	JACZAX000000000
human	Enterococcus faecalis	HUM-570	Homo sapiens	faeces	colonization	no	–	Estonia	2012-06-14	1.5	PRJNA630511	SAMN15957563	GCA_014853815.1	JACZAW000000000
human	Enterococcus faecalis	HUM-571	Homo sapiens	faeces	colonization	no	–	Estonia	2012-05-21	2	PRJNA630512	SAMN15957564	GCA_014853775.1	JACZAV000000000
human	Enterococcus faecalis	HUM-572	Homo sapiens	faeces	colonization	no	–	Estonia	2012-08-09	6	PRJNA630513	SAMN15957565	GCA_014854945.1	JACZAU000000000
human	Enterococcus faecalis	HUM-573	Homo sapiens	wound discharge	infection	yes	Skin and soft tissue infection	Estonia	2013-07-13	256	PRJNA630514	SAMN15957566	GCA_014854955.1	JACZAT000000000
veterinary	Enterococcus faecalis	VET-195	Bos taurus	faeces	colonization	–	–	Estonia	2014	2	PRJNA630515	SAMN15957569	GCA_014853625.1	JACZAQ000000000
veterinary	Enterococcus faecalis	VET-197	Bos taurus	faeces	colonization	–	–	Estonia	2014	3	PRJNA630516	SAMN15957570	GCA_014853615.1	JACZAP000000000
veterinary	Enterococcus faecalis	VET-198	Bos taurus	faeces	colonization	–	–	Estonia	2014	2	PRJNA630517	SAMN15957571	GCA_014853605.1	JACZAO000000000
veterinary	Enterococcus faecalis	VET-199	Sus scrofa	faeces	colonization	–	–	Estonia	2014	3	PRJNA630518	SAMN15957572	GCA_014853595.1	JACZAN000000000
veterinary	Enterococcus faecalis	VET-200	Sus scrofa	faeces	colonization	–	–	Estonia	2014	1.5	PRJNA630519	SAMN15957573	GCA_014853555.1	JACZAM000000000
veterinary	Enterococcus faecalis	VET-204	Bos taurus	faeces	colonization	–	–	Estonia	2014	2	PRJNA630520	SAMN15957574	GCA_014853565.1	JACZAL000000000
veterinary	Enterococcus faecalis	VET-229	Gallus gallus	caecal content	colonization	–	–	Estonia	2014	2	PRJNA630521	SAMN15957578	GCA_014853495.1	JACZAH000000000
veterinary	Enterococcus faecalis	VET-230	Gallus gallus	caecal content	colonization	–	–	Estonia	2014	2	PRJNA630522	SAMN15957579	GCA_014853475.1	JACZAG000000000
veterinary	Enterococcus faecalis	VET-237	Gallus gallus	caecal content	colonization	–	–	Estonia	2014	2	PRJNA630523	SAMN15957582	GCA_014853375.1	JACZAD000000000
veterinary	Enterococcus faecalis	VET-238	Gallus gallus	caecal content	colonization	–	–	Estonia	2014	1	PRJNA630524	SAMN15957583	GCA_014853405.1	JACZAC000000000
veterinary	Enterococcus faecalis	VET-239	Gallus gallus	caecal content	colonization	–	–	Estonia	2014	1	PRJNA630525	SAMN15957584	GCA_014853395.1	JACZAB000000000
veterinary	Enterococcus faecalis	VET-240	Gallus gallus	caecal content	colonization	–	–	Estonia	2014	2	PRJNA630526	SAMN15957585	GCA_014853365.1	JACZAA000000000
veterinary	Enterococcus faecalis	VET-242	Gallus gallus	caecal content	colonization	–	–	Estonia	2014	2	PRJNA630527	SAMN15957587	GCA_014853285.1	JACYZY000000000
veterinary	Enterococcus faecalis	VET-246	Gallus gallus	caecal content	colonization	–	–	Estonia	2014	2	PRJNA630528	SAMN15957589	GCA_014853265.1	JACYZW000000000
veterinary	Enterococcus faecalis	VET-247	Gallus gallus	caecal content	colonization	–	–	Estonia	2014	1	PRJNA630529	SAMN15957590	GCA_014853275.1	JACYZV000000000
veterinary	Enterococcus faecalis	VET-248	Gallus gallus	caecal content	colonization	–	–	Estonia	2014	2	PRJNA630530	SAMN15957591	GCA_014853215.1	JACYZU000000000
veterinary	Enterococcus faecalis	VET-250	Gallus gallus	caecal content	colonization	–	–	Estonia	2014	1.5	PRJNA630531	SAMN15957592	GCA_014853185.1	JACYZT000000000
veterinary	Enterococcus faecalis	VET-252	Gallus gallus	caecal content	colonization	–	–	Estonia	2014	2	PRJNA630532	SAMN15957593	GCA_014853205.1	JACYZS000000000
veterinary	Enterococcus faecalis	VET-253	Gallus gallus	caecal content	colonization	–	–	Estonia	2014	3	PRJNA630533	SAMN15957594	GCA_014853195.1	JACYZR000000000
veterinary	Enterococcus faecalis	VET-255	Gallus gallus	caecal content	colonization	–	–	Estonia	2014	3	PRJNA630534	SAMN15957595	GCA_014853165.1	JACYZQ000000000
veterinary	Enterococcus faecalis	VET-257	Gallus gallus	caecal content	colonization	–	–	Estonia	2014	1.5	PRJNA630535	SAMN15957596	GCA_014853125.1	JACYZP000000000
veterinary	Enterococcus faecalis	VET-258	Gallus gallus	caecal content	colonization	–	–	Estonia	2014	2	PRJNA630536	SAMN15957597	GCA_014853105.1	JACYZO000000000
veterinary	Enterococcus faecalis	VET-260	Gallus gallus	caecal content	colonization	–	–	Estonia	2014	1.5	PRJNA630537	SAMN15957598	GCA_014853115.1	JACYZN000000000

## Sheet: MICs
ENV-93	2
ENV-128	6
ENV-155	3
BIRD-62	3
BIRD-63	1.5
BIRD-64	1.5
BIRD-65	1
BIRD-73	1
BIRD-74	1.5
BIRD-78	3
BIRD-91	1.5
BIRD-94	1.5
BIRD-97	2
BIRD-101	3
BIRD-102	1
BIRD-126	3
BIRD-127	1.5
BIRD-128	3
BIRD-129	1.5
BIRD-130	1
BIRD-131	3
BIRD-132	1
BIRD-134	1
BIRD-135	1
BIRD-136	1.5
BIRD-137	1.5
BIRD-178	1
BIRD-234	2
BIRD-238	2
ENV-505	1.5
ENV-506	1.5
ENV-507	3
ENV-508	3
ENV-509	3
ENV-510	3
ENV-511	2
ENV-512	3
ENV-513	3
ENV-515	2
ENV-516	1.5
ENV-517	1.5
ENV-519	1.5
ENV-527	3
ENV-528	3
ENV-532	1.5
ENV-533	1.5
ENV-534	1.5
TI-TÜF036	1.5
TI-TÜF050	1.5
TKOF-91	1.5
TKOF-4	2
TKOF-101	6
ITKH-090	256
HITÜ-161	1
HITÜ-162	1.5
VET-191	0.5
VET-192	2
VET-193	1
VET-194	0.5
VET-195	2
VET-196	2
VET-197	3
VET-198	2
VET-199	3
VET-200	1.5
VET-201	1.5
VET-202	2
VET-203	1
VET-204	2
VET-207	3
VET-209	0.75
VET-210	2
VET-211	2
VET-212	1.5
VET-213	2
VET-214	1.5
VET-215	3
VET-216	1.5
VET-217	1.5
VET-218	2
VET-219	3
VET-220	2
VET-221	1.5
VET-222	1
VET-223	4
VET-224	6
VET-225	1.5
VET-226	1.5
VET-227	3
VET-228	2
VET-229	2
VET-230	2
VET-231	2
VET-232	2
VET-233	2
VET-234	2
VET-235	1
VET-236	2
VET-237	2
VET-239	1
VET-240	2
VET-242	2
VET-243	2
VET-244	0.5
VET-245	2
VET-246	2
VET-247	1
VET-248	2
VET-249	2
VET-250	1.5
VET-251	1.5
VET-252	2
VET-253	3
VET-254	2
VET-255	3
VET-256	1
VET-257	1.5
VET-258	2
VET-259	1
VET-260	1.5
BIRD-170	0.75
BIRD-173	0.5
BIRD-174	0.75
BIRD-175	1.0
BIRD-176	0.75
BIRD-185	0.38
BIRD-204	tass puudu
BIRD-206	tass puudu
ENV-229	>256
ENV-231	>256
ENV-239	>256
ENV-269	0.38
ENV-272	>256
ENV-273	0.5
ENV-283	0.38
ENV-324	0.75
HUM-409	32
VET-205	0.38
VET-206	1
VET-208	1
VET-238	1
VET-241	0.5
VET-261	0.75
VET-262	1.5
VET-263	0.38
VET-264	0.75
VET-265	0.5
VET-266	0.5
VET-267	0.38
VET-268	0.75
VET-269	0.75
VET-271	1.0
VET-272	1.5
VET-275	0.38
VET-276	0.75
VET-277	0.38
VET-279	0.5
VET-281	0.25
VET-283	0.38
VET-285	0.5
VET-287	0.5
ENV-204	0.19
ENV-206	0.25
228	1.5
201	0.38
200	0.75
261	0.5
240	0.38

## Sheet: References
				BIRD-126	Enterococcus faecalis		GCA_014855445.1		JACZCI000000000	SAMN15957525	https://www.ncbi.nlm.nih.gov/biosample/SAMN15957525	https://www.ncbi.nlm.nih.gov/assembly/GCA_014855445.1
				BIRD-102	Enterococcus faecalis		GCA_014855435.1		JACZCJ000000000	SAMN15957524	https://www.ncbi.nlm.nih.gov/biosample/SAMN15957524	https://www.ncbi.nlm.nih.gov/assembly/GCA_014855435.1
				BIRD-127	Enterococcus faecalis		GCA_014855415.1		JACZCH000000000	SAMN15957526	https://www.ncbi.nlm.nih.gov/biosample/SAMN15957526	https://www.ncbi.nlm.nih.gov/assembly/GCA_014855415.1
				BIRD-175	Enterococcus faecalis		GCA_014855355.1		JACZCD000000000	SAMN15957530	https://www.ncbi.nlm.nih.gov/biosample/SAMN15957530	https://www.ncbi.nlm.nih.gov/assembly/GCA_014855355.1
				BIRD-174	Enterococcus faecalis		GCA_014855375.1		JACZCE000000000	SAMN15957529	https://www.ncbi.nlm.nih.gov/biosample/SAMN15957529	https://www.ncbi.nlm.nih.gov/assembly/GCA_014855375.1
				BIRD-170	Enterococcus faecalis		GCA_014855345.1		JACZCG000000000	SAMN15957527	https://www.ncbi.nlm.nih.gov/biosample/SAMN15957527	https://www.ncbi.nlm.nih.gov/assembly/GCA_014855345.1
				BIRD-176	Enterococcus faecalis		GCA_014855335.1		JACZCC000000000	SAMN15957531	https://www.ncbi.nlm.nih.gov/biosample/SAMN15957531	https://www.ncbi.nlm.nih.gov/assembly/GCA_014855335.1
				BIRD-178	Enterococcus faecalis		GCA_014855315.1		JACZCB000000000	SAMN15957532	https://www.ncbi.nlm.nih.gov/biosample/SAMN15957532	https://www.ncbi.nlm.nih.gov/assembly/GCA_014855315.1
				BIRD-238	Enterococcus faecalis		GCA_014855285.1		JACZBZ000000000	SAMN15957534	https://www.ncbi.nlm.nih.gov/biosample/SAMN15957534	https://www.ncbi.nlm.nih.gov/assembly/GCA_014855285.1
				BIRD-63	Enterococcus faecalis		GCA_014855265.1		JACZBX000000000	SAMN15957536	https://www.ncbi.nlm.nih.gov/biosample/SAMN15957536	https://www.ncbi.nlm.nih.gov/assembly/GCA_014855265.1
				BIRD-62	Enterococcus faecalis		GCA_014855245.1		JACZBY000000000	SAMN15957535	https://www.ncbi.nlm.nih.gov/biosample/SAMN15957535	https://www.ncbi.nlm.nih.gov/assembly/GCA_014855245.1
				BIRD-64	Enterococcus faecalis		GCA_014855235.1		JACZBW000000000	SAMN15957537	https://www.ncbi.nlm.nih.gov/biosample/SAMN15957537	https://www.ncbi.nlm.nih.gov/assembly/GCA_014855235.1
				BIRD-65	Enterococcus faecalis		GCA_014855215.1		JACZBV000000000	SAMN15957538	https://www.ncbi.nlm.nih.gov/biosample/SAMN15957538	https://www.ncbi.nlm.nih.gov/assembly/GCA_014855215.1
				BIRD-73	Enterococcus faecalis		GCA_014855175.1		JACZBU000000000	SAMN15957539	https://www.ncbi.nlm.nih.gov/biosample/SAMN15957539	https://www.ncbi.nlm.nih.gov/assembly/GCA_014855175.1
				BIRD-74	Enterococcus faecalis		GCA_014855165.1		JACZBT000000000	SAMN15957540	https://www.ncbi.nlm.nih.gov/biosample/SAMN15957540	https://www.ncbi.nlm.nih.gov/assembly/GCA_014855165.1
				BIRD-91	Enterococcus faecalis		GCA_014855155.1		JACZBR000000000	SAMN15957542	https://www.ncbi.nlm.nih.gov/biosample/SAMN15957542	https://www.ncbi.nlm.nih.gov/assembly/GCA_014855155.1
				ENV-155	Enterococcus faecalis		GCA_014855115.1		JACZBL000000000	SAMN15957548	https://www.ncbi.nlm.nih.gov/biosample/SAMN15957548	https://www.ncbi.nlm.nih.gov/assembly/GCA_014855115.1
				ENV-505	Enterococcus faecalis		GCA_014855045.1		JACZBH000000000	SAMN15957552	https://www.ncbi.nlm.nih.gov/biosample/SAMN15957552	https://www.ncbi.nlm.nih.gov/assembly/GCA_014855045.1
				HUM-326	Enterococcus faecalis		GCA_014855035.1		JACZBB000000000	SAMN15957558	https://www.ncbi.nlm.nih.gov/biosample/SAMN15957558	https://www.ncbi.nlm.nih.gov/assembly/GCA_014855035.1
				ENV-506	Enterococcus faecalis		GCA_014855015.1		JACZBG000000000	SAMN15957553	https://www.ncbi.nlm.nih.gov/biosample/SAMN15957553	https://www.ncbi.nlm.nih.gov/assembly/GCA_014855015.1
				HUM-573	Enterococcus faecalis		GCA_014854955.1		JACZAT000000000	SAMN15957566	https://www.ncbi.nlm.nih.gov/biosample/SAMN15957566	https://www.ncbi.nlm.nih.gov/assembly/GCA_014854955.1
				HUM-572	Enterococcus faecalis		GCA_014854945.1		JACZAU000000000	SAMN15957565	https://www.ncbi.nlm.nih.gov/biosample/SAMN15957565	https://www.ncbi.nlm.nih.gov/assembly/GCA_014854945.1
				BIRD-78	Enterococcus faecalis		GCA_014854205.1		JACZBS000000000	SAMN15957541	https://www.ncbi.nlm.nih.gov/biosample/SAMN15957541	https://www.ncbi.nlm.nih.gov/assembly/GCA_014854205.1
				BIRD-97	Enterococcus faecalis		GCA_014854165.1		JACZBP000000000	SAMN15957544	https://www.ncbi.nlm.nih.gov/biosample/SAMN15957544	https://www.ncbi.nlm.nih.gov/assembly/GCA_014854165.1
				BIRD-94	Enterococcus faecalis		GCA_014854175.1		JACZBQ000000000	SAMN15957543	https://www.ncbi.nlm.nih.gov/biosample/SAMN15957543	https://www.ncbi.nlm.nih.gov/assembly/GCA_014854175.1
				ENV-128	Enterococcus faecalis		GCA_014854055.1		JACZBN000000000	SAMN15957546	https://www.ncbi.nlm.nih.gov/biosample/SAMN15957546	https://www.ncbi.nlm.nih.gov/assembly/GCA_014854055.1
				ENV-131	Enterococcus faecalis		GCA_014854065.1		JACZBM000000000	SAMN15957547	https://www.ncbi.nlm.nih.gov/biosample/SAMN15957547	https://www.ncbi.nlm.nih.gov/assembly/GCA_014854065.1
				ENV-507	Enterococcus faecalis		GCA_014854015.1		JACZBF000000000	SAMN15957554	https://www.ncbi.nlm.nih.gov/biosample/SAMN15957554	https://www.ncbi.nlm.nih.gov/assembly/GCA_014854015.1
				ENV-93	Enterococcus faecalis		GCA_014853915.1		JACZBD000000000	SAMN15957556	https://www.ncbi.nlm.nih.gov/biosample/SAMN15957556	https://www.ncbi.nlm.nih.gov/assembly/GCA_014853915.1
				ENV-79	Enterococcus faecalis		GCA_014853935.1		JACZBE000000000	SAMN15957555	https://www.ncbi.nlm.nih.gov/biosample/SAMN15957555	https://www.ncbi.nlm.nih.gov/assembly/GCA_014853935.1
				HUM-320-D2	Enterococcus faecalis		GCA_014853945.1		JACZBC000000000	SAMN15957557	https://www.ncbi.nlm.nih.gov/biosample/SAMN15957557	https://www.ncbi.nlm.nih.gov/assembly/GCA_014853945.1
				HUM-570	Enterococcus faecalis		GCA_014853815.1		JACZAW000000000	SAMN15957563	https://www.ncbi.nlm.nih.gov/biosample/SAMN15957563	https://www.ncbi.nlm.nih.gov/assembly/GCA_014853815.1
				HUM-409	Enterococcus faecalis		GCA_014853825.1		JACZAZ000000000	SAMN15957560	https://www.ncbi.nlm.nih.gov/biosample/SAMN15957560	https://www.ncbi.nlm.nih.gov/assembly/GCA_014853825.1
				HUM-569	Enterococcus faecalis		GCA_014853845.1		JACZAX000000000	SAMN15957562	https://www.ncbi.nlm.nih.gov/biosample/SAMN15957562	https://www.ncbi.nlm.nih.gov/assembly/GCA_014853845.1
				HUM-328	Enterococcus faecalis		GCA_014853795.1		JACZBA000000000	SAMN15957559	https://www.ncbi.nlm.nih.gov/biosample/SAMN15957559	https://www.ncbi.nlm.nih.gov/assembly/GCA_014853795.1
				HUM-571	Enterococcus faecalis		GCA_014853775.1		JACZAV000000000	SAMN15957564	https://www.ncbi.nlm.nih.gov/biosample/SAMN15957564	https://www.ncbi.nlm.nih.gov/assembly/GCA_014853775.1
				VET-195	Enterococcus faecalis		GCA_014853625.1		JACZAQ000000000	SAMN15957569	https://www.ncbi.nlm.nih.gov/biosample/SAMN15957569	https://www.ncbi.nlm.nih.gov/assembly/GCA_014853625.1
				VET-198	Enterococcus faecalis		GCA_014853605.1		JACZAO000000000	SAMN15957571	https://www.ncbi.nlm.nih.gov/biosample/SAMN15957571	https://www.ncbi.nlm.nih.gov/assembly/GCA_014853605.1
				VET-197	Enterococcus faecalis		GCA_014853615.1		JACZAP000000000	SAMN15957570	https://www.ncbi.nlm.nih.gov/biosample/SAMN15957570	https://www.ncbi.nlm.nih.gov/assembly/GCA_014853615.1
				VET-199	Enterococcus faecalis		GCA_014853595.1		JACZAN000000000	SAMN15957572	https://www.ncbi.nlm.nih.gov/biosample/SAMN15957572	https://www.ncbi.nlm.nih.gov/assembly/GCA_014853595.1
				VET-204	Enterococcus faecalis		GCA_014853565.1		JACZAL000000000	SAMN15957574	https://www.ncbi.nlm.nih.gov/biosample/SAMN15957574	https://www.ncbi.nlm.nih.gov/assembly/GCA_014853565.1
				VET-200	Enterococcus faecalis		GCA_014853555.1		JACZAM000000000	SAMN15957573	https://www.ncbi.nlm.nih.gov/biosample/SAMN15957573	https://www.ncbi.nlm.nih.gov/assembly/GCA_014853555.1
				VET-229	Enterococcus faecalis		GCA_014853495.1		JACZAH000000000	SAMN15957578	https://www.ncbi.nlm.nih.gov/biosample/SAMN15957578	https://www.ncbi.nlm.nih.gov/assembly/GCA_014853495.1
				BIRD-101	Enterococcus faecalis		GCA_014854385.1		JACZCK000000000	SAMN15957523	https://www.ncbi.nlm.nih.gov/biosample/SAMN15957523	https://www.ncbi.nlm.nih.gov/assembly/GCA_014854385.1
				BIRD-173	Enterococcus faecalis		GCA_014854325.1		JACZCF000000000	SAMN15957528	https://www.ncbi.nlm.nih.gov/biosample/SAMN15957528	https://www.ncbi.nlm.nih.gov/assembly/GCA_014854325.1
				VET-230	Enterococcus faecalis		GCA_014853475.1		JACZAG000000000	SAMN15957579	https://www.ncbi.nlm.nih.gov/biosample/SAMN15957579	https://www.ncbi.nlm.nih.gov/assembly/GCA_014853475.1
				VET-238	Enterococcus faecalis		GCA_014853405.1		JACZAC000000000	SAMN15957583	https://www.ncbi.nlm.nih.gov/biosample/SAMN15957583	https://www.ncbi.nlm.nih.gov/assembly/GCA_014853405.1
				VET-239	Enterococcus faecalis		GCA_014853395.1		JACZAB000000000	SAMN15957584	https://www.ncbi.nlm.nih.gov/biosample/SAMN15957584	https://www.ncbi.nlm.nih.gov/assembly/GCA_014853395.1
				VET-240	Enterococcus faecalis		GCA_014853365.1		JACZAA000000000	SAMN15957585	https://www.ncbi.nlm.nih.gov/biosample/SAMN15957585	https://www.ncbi.nlm.nih.gov/assembly/GCA_014853365.1
				VET-237	Enterococcus faecalis		GCA_014853375.1		JACZAD000000000	SAMN15957582	https://www.ncbi.nlm.nih.gov/biosample/SAMN15957582	https://www.ncbi.nlm.nih.gov/assembly/GCA_014853375.1
				VET-247	Enterococcus faecalis		GCA_014853275.1		JACYZV000000000	SAMN15957590	https://www.ncbi.nlm.nih.gov/biosample/SAMN15957590	https://www.ncbi.nlm.nih.gov/assembly/GCA_014853275.1
				VET-242	Enterococcus faecalis		GCA_014853285.1		JACYZY000000000	SAMN15957587	https://www.ncbi.nlm.nih.gov/biosample/SAMN15957587	https://www.ncbi.nlm.nih.gov/assembly/GCA_014853285.1
				VET-246	Enterococcus faecalis		GCA_014853265.1		JACYZW000000000	SAMN15957589	https://www.ncbi.nlm.nih.gov/biosample/SAMN15957589	https://www.ncbi.nlm.nih.gov/assembly/GCA_014853265.1
				VET-248	Enterococcus faecalis		GCA_014853215.1		JACYZU000000000	SAMN15957591	https://www.ncbi.nlm.nih.gov/biosample/SAMN15957591	https://www.ncbi.nlm.nih.gov/assembly/GCA_014853215.1
				VET-252	Enterococcus faecalis		GCA_014853205.1		JACYZS000000000	SAMN15957593	https://www.ncbi.nlm.nih.gov/biosample/SAMN15957593	https://www.ncbi.nlm.nih.gov/assembly/GCA_014853205.1
				VET-250	Enterococcus faecalis		GCA_014853185.1		JACYZT000000000	SAMN15957592	https://www.ncbi.nlm.nih.gov/biosample/SAMN15957592	https://www.ncbi.nlm.nih.gov/assembly/GCA_014853185.1
				VET-253	Enterococcus faecalis		GCA_014853195.1		JACYZR000000000	SAMN15957594	https://www.ncbi.nlm.nih.gov/biosample/SAMN15957594	https://www.ncbi.nlm.nih.gov/assembly/GCA_014853195.1
				VET-255	Enterococcus faecalis		GCA_014853165.1		JACYZQ000000000	SAMN15957595	https://www.ncbi.nlm.nih.gov/biosample/SAMN15957595	https://www.ncbi.nlm.nih.gov/assembly/GCA_014853165.1
				VET-257	Enterococcus faecalis		GCA_014853125.1		JACYZP000000000	SAMN15957596	https://www.ncbi.nlm.nih.gov/biosample/SAMN15957596	https://www.ncbi.nlm.nih.gov/assembly/GCA_014853125.1
				VET-258	Enterococcus faecalis		GCA_014853105.1		JACYZO000000000	SAMN15957597	https://www.ncbi.nlm.nih.gov/biosample/SAMN15957597	https://www.ncbi.nlm.nih.gov/assembly/GCA_014853105.1
				VET-260	Enterococcus faecalis		GCA_014853115.1		JACYZN000000000	SAMN15957598	https://www.ncbi.nlm.nih.gov/biosample/SAMN15957598	https://www.ncbi.nlm.nih.gov/assembly/GCA_014853115.1
				VET-261	Enterococcus faecium		GCA_014853085.1		JACYZM000000000	SAMN15957599	https://www.ncbi.nlm.nih.gov/biosample/SAMN15957599	https://www.ncbi.nlm.nih.gov/assembly/GCA_014853085.1
				VET-262	Enterococcus faecium		GCA_014853065.1		JACYZL000000000	SAMN15957600	https://www.ncbi.nlm.nih.gov/biosample/SAMN15957600	https://www.ncbi.nlm.nih.gov/assembly/GCA_014853065.1
				VET-263	Enterococcus faecium		GCA_014853025.1		JACYZK000000000	SAMN15957601	https://www.ncbi.nlm.nih.gov/biosample/SAMN15957601	https://www.ncbi.nlm.nih.gov/assembly/GCA_014853025.1
				VET-265	Enterococcus faecium		GCA_014852995.1		JACYZI000000000	SAMN15957603	https://www.ncbi.nlm.nih.gov/biosample/SAMN15957603	https://www.ncbi.nlm.nih.gov/assembly/GCA_014852995.1
				VET-266	Enterococcus faecium		GCA_014853005.1		JACYZH000000000	SAMN15957604	https://www.ncbi.nlm.nih.gov/biosample/SAMN15957604	https://www.ncbi.nlm.nih.gov/assembly/GCA_014853005.1
				VET-264	Enterococcus faecium		GCA_014852975.1		JACYZJ000000000	SAMN15957602	https://www.ncbi.nlm.nih.gov/biosample/SAMN15957602	https://www.ncbi.nlm.nih.gov/assembly/GCA_014852975.1
				VET-267	Enterococcus faecium		GCA_014852955.1		JACYZG000000000	SAMN15957605	https://www.ncbi.nlm.nih.gov/biosample/SAMN15957605	https://www.ncbi.nlm.nih.gov/assembly/GCA_014852955.1
				VET-268	Enterococcus faecium		GCA_014852945.1		JACYZF000000000	SAMN15957606	https://www.ncbi.nlm.nih.gov/biosample/SAMN15957606	https://www.ncbi.nlm.nih.gov/assembly/GCA_014852945.1
				VET-271	Enterococcus faecium		GCA_014852885.1		JACYZD000000000	SAMN15957608	https://www.ncbi.nlm.nih.gov/biosample/SAMN15957608	https://www.ncbi.nlm.nih.gov/assembly/GCA_014852885.1
				VET-269	Enterococcus faecium		GCA_014852875.1		JACYZE000000000	SAMN15957607	https://www.ncbi.nlm.nih.gov/biosample/SAMN15957607	https://www.ncbi.nlm.nih.gov/assembly/GCA_014852875.1
				VET-272	Enterococcus faecium		GCA_014852865.1		JACYZC000000000	SAMN15957609	https://www.ncbi.nlm.nih.gov/biosample/SAMN15957609	https://www.ncbi.nlm.nih.gov/assembly/GCA_014852865.1
				VET-275	Enterococcus faecium		GCA_014852855.1		JACYZB000000000	SAMN15957610	https://www.ncbi.nlm.nih.gov/biosample/SAMN15957610	https://www.ncbi.nlm.nih.gov/assembly/GCA_014852855.1
				VET-276	Enterococcus faecium		GCA_014852845.1		JACYZA000000000	SAMN15957611	https://www.ncbi.nlm.nih.gov/biosample/SAMN15957611	https://www.ncbi.nlm.nih.gov/assembly/GCA_014852845.1
				VET-279	Enterococcus faecium		GCA_014852815.1		JACYYY000000000	SAMN15957613	https://www.ncbi.nlm.nih.gov/biosample/SAMN15957613	https://www.ncbi.nlm.nih.gov/assembly/GCA_014852815.1
				VET-277	Enterococcus faecium		GCA_014852805.1		JACYYZ000000000	SAMN15957612	https://www.ncbi.nlm.nih.gov/biosample/SAMN15957612	https://www.ncbi.nlm.nih.gov/assembly/GCA_014852805.1
				VET-285	Enterococcus faecium		GCA_014852765.1		JACYYV000000000	SAMN15957616	https://www.ncbi.nlm.nih.gov/biosample/SAMN15957616	https://www.ncbi.nlm.nih.gov/assembly/GCA_014852765.1
				VET-281	Enterococcus faecium		GCA_014852755.1		JACYYX000000000	SAMN15957614	https://www.ncbi.nlm.nih.gov/biosample/SAMN15957614	https://www.ncbi.nlm.nih.gov/assembly/GCA_014852755.1
				VET-283	Enterococcus faecium		GCA_014852745.1		JACYYW000000000	SAMN15957615	https://www.ncbi.nlm.nih.gov/biosample/SAMN15957615	https://www.ncbi.nlm.nih.gov/assembly/GCA_014852745.1
				VET-287	Enterococcus faecium		GCA_014852665.1		JACYYU000000000	SAMN15957617	https://www.ncbi.nlm.nih.gov/biosample/SAMN15957617	https://www.ncbi.nlm.nih.gov/assembly/GCA_014852665.1
				VET-241	Enterococcus faecium		GCA_014853295.1		JACYZZ000000000	SAMN15957586	https://www.ncbi.nlm.nih.gov/biosample/SAMN15957586	https://www.ncbi.nlm.nih.gov/assembly/GCA_014853295.1
				VET-244	Enterococcus faecium		GCA_014853305.1		JACYZX000000000	SAMN15957588	https://www.ncbi.nlm.nih.gov/biosample/SAMN15957588	https://www.ncbi.nlm.nih.gov/assembly/GCA_014853305.1
				VET-208	Enterococcus faecium		GCA_014853505.1		JACZAJ000000000	SAMN15957576	https://www.ncbi.nlm.nih.gov/biosample/SAMN15957576	https://www.ncbi.nlm.nih.gov/assembly/GCA_014853505.1
				VET-234	Enterococcus faecium		GCA_014853415.1		JACZAE000000000	SAMN15957581	https://www.ncbi.nlm.nih.gov/biosample/SAMN15957581	https://www.ncbi.nlm.nih.gov/assembly/GCA_014853415.1
				BIRD-185	Enterococcus faecium		GCA_014854265.1		JACZCA000000000	SAMN15957533	https://www.ncbi.nlm.nih.gov/biosample/SAMN15957533	https://www.ncbi.nlm.nih.gov/assembly/GCA_014854265.1
				VET-209	Enterococcus faecium		GCA_014853485.1		JACZAI000000000	SAMN15957577	https://www.ncbi.nlm.nih.gov/biosample/SAMN15957577	https://www.ncbi.nlm.nih.gov/assembly/GCA_014853485.1
				VET-206	Enterococcus faecium		GCA_014853675.1		JACZAK000000000	SAMN15957575	https://www.ncbi.nlm.nih.gov/biosample/SAMN15957575	https://www.ncbi.nlm.nih.gov/assembly/GCA_014853675.1
				HUM-568	Enterococcus faecium		GCA_014853835.1		JACZAY000000000	SAMN15957561	https://www.ncbi.nlm.nih.gov/biosample/SAMN15957561	https://www.ncbi.nlm.nih.gov/assembly/GCA_014853835.1
				ENV-269	Enterococcus faecium		GCA_014854075.1		JACZBK000000000	SAMN15957549	https://www.ncbi.nlm.nih.gov/biosample/SAMN15957549	https://www.ncbi.nlm.nih.gov/assembly/GCA_014854075.1
				VET-233	Enterococcus faecium		GCA_014854925.1		JACZAF000000000	SAMN15957580	https://www.ncbi.nlm.nih.gov/biosample/SAMN15957580	https://www.ncbi.nlm.nih.gov/assembly/GCA_014854925.1
				HUM-575	Enterococcus faecium		GCA_014854915.1		JACZAR000000000	SAMN15957568	https://www.ncbi.nlm.nih.gov/biosample/SAMN15957568	https://www.ncbi.nlm.nih.gov/assembly/GCA_014854915.1
				HUM-574	Enterococcus faecium		GCA_014854975.1		JACZAS000000000	SAMN15957567	https://www.ncbi.nlm.nih.gov/biosample/SAMN15957567	https://www.ncbi.nlm.nih.gov/assembly/GCA_014854975.1
				ENV-283	Enterococcus faecium		GCA_014855085.1		JACZBJ000000000	SAMN15957550	https://www.ncbi.nlm.nih.gov/biosample/SAMN15957550	https://www.ncbi.nlm.nih.gov/assembly/GCA_014855085.1
				ENV-324	Enterococcus faecium		GCA_014855055.1		JACZBI000000000	SAMN15957551	https://www.ncbi.nlm.nih.gov/biosample/SAMN15957551	https://www.ncbi.nlm.nih.gov/assembly/GCA_014855055.1
				ENV-120	Enterococcus faecium		GCA_014855125.1		JACZBO000000000	SAMN15957545	https://www.ncbi.nlm.nih.gov/biosample/SAMN15957545	https://www.ncbi.nlm.nih.gov/assembly/GCA_014855125.1
